# Supplementary material
Source: Springer Nature journal article supplement (https://www.springermedizin.de/resource/supplementary/12935_2009_240_MOESM4_ESM.pdf/9540224)

Time (h) 0 0.5 1 2 7

MMP-2

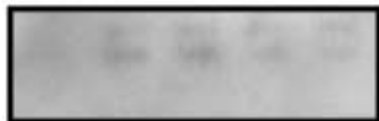

72kDa  
63kDa

MMP-9

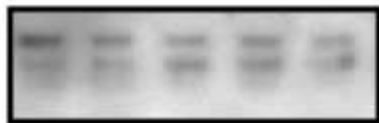

92kDa  
82kDa

MT1-MMP

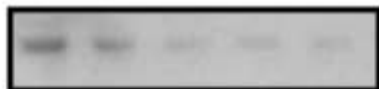

63kDa

GAPDH

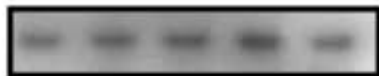

37kDa

Supplement: MOESM4 [file 9540224]
